# Supplementary material for: Infiltration by CXCL10 Secreting Macrophages Is Associated With Antitumor Immunity and Response to Therapy in Ovarian Cancer Subtypes
Source: PubMed Central journal article supplement (PMC8253056; doi:10.3389/fimmu.2021.690201), 2021-06-18
Supplement: DataSheet_2.pdf [file DataSheet_2.pdf]

## **Infiltration by CXCL10 secreting macrophages is associated with antitumor immunity and response to therapy in ovarian cancer subtypes**

Laura Ardighieri<sup>†1</sup>, Francesco Missale<sup>†2,3</sup>, Mattia Bugatti<sup>†1,2</sup>, Luisa Benerini Gatta<sup>2</sup>, Irene Pezzali<sup>2</sup>, Matilde Monti<sup>2</sup>, Stefano Gottardi<sup>4</sup>, Laura Zanotti<sup>5,6</sup>, Eliana Bignotti<sup>5,6</sup>, Antonella Ravaggi<sup>5,6,7</sup>, Germana Tognon<sup>6</sup>, Franco Odicino<sup>6,7</sup>, Stefano Calza<sup>8,9,10</sup>, Yoann Missolo-Koussou<sup>11</sup>, Carola Hermine Ries<sup>12</sup>, Julie Helft<sup>11</sup> and William Vermi<sup>\*1,2,13</sup>

<sup>1</sup> Unit of Pathology, ASST Spedali Civili di Brescia, 25100 Brescia, Italy

<sup>2</sup> Department of Molecular and Translational Medicine, University of Brescia, 25125 Brescia, Italy

<sup>3</sup> IRCCS Ospedale Policlinico San Martino, 16121 Genova, Italy

<sup>4</sup> Diatech Pharmacogenetics srl, 60035 Jesi, Italy

<sup>5</sup> “Angelo Nocivelli” Institute of Molecular Medicine, ASST Spedali Civili of Brescia-University of Brescia, 25123 Brescia, Italy

<sup>6</sup> Division of Obstetrics and Gynecology, ASST Spedali Civili di Brescia, Brescia, Italy

<sup>7</sup> Department of Clinical and Experimental Science, University of Brescia, 25125 Brescia, Italy

<sup>8</sup> Unit of Biostatistics, Department of Molecular and Translational Medicine, University of Brescia, 25125 Brescia, Italy

<sup>9</sup> Department of Medical Epidemiology and Biostatistics, Karolinska Institutet, 17177 Stockholm, Sweden

<sup>10</sup> Big & Open Data Innovation Laboratory, University of Brescia, 25125 Brescia, Italy

<sup>11</sup> PSL University, Institut Curie Research Center, INSERM U932 & SiRIC, Center for cancers immunotherapy, Translational Immunotherapy Team, F-75005, Paris, France.

<sup>12</sup> Dr. Carola Ries Consulting, 82377 Penzberg, Germany

<sup>13</sup> Department of Pathology and Immunology, Washington University School of Medicine, St. Louis, MO 63130, USA

\* Correspondence: [william.vermi@unibs.it](mailto:william.vermi@unibs.it); phone:+39-030-399-8425

† These authors equally contributed to the work.

Running title: Immune-contexture in ovarian cancer

Keywords: T-cells, macrophages, ovarian cancer, signature, interferon gamma

**Supplementary Tables****Supplementary Table S1:** Full database of the OC cohort considered (attached excel file))**Supplementary Table S2:** Nanostring probes details (attached excel file)**Supplementary Table S3.** Gene Expression Assays.

| <b>Gene</b>       | <b>Cat. no.</b> | <b>Company</b>           |
|-------------------|-----------------|--------------------------|
| <b>COX2/PTGS2</b> | Hs00153133 m1   | Thermo Fisher Scientific |
| <b>CXCL10</b>     | Hs00171042 m1   | Thermo Fisher Scientific |
| <b>IL-6</b>       | Hs00174131 m1   | Thermo Fisher Scientific |
| <b>RPS18</b>      | qHsaCEP0040177  | Bio-Rad                  |

**Supplementary Table S4:** Western blotting antibodies.

| <b>Antibody</b> | <b>Clone</b> | <b>Isotype</b> | <b>Company</b>  | <b>Dilution</b> |
|-----------------|--------------|----------------|-----------------|-----------------|
| Actin           | polyclonal   | Rabbit         | Sigma – Aldrich | 1:1000          |
| IRF-1           | D5E4         | Rabbit         | Cell Signaling  | 1:1000          |
| IRF-4           | E8H3S        | Rabbit         | Cell Signaling  | 1:1000          |
| pStat1 (Tyr701) | 58D6         | Rabbit         | Cell Signaling  | 1:1000          |
| Stat1           | polyclonal   | Rabbit         | Cell Signaling  | 1:1000          |

**Supplementary Table S5:** Univariable survival analysis of HGSC

| Variables           |           | N. (%)   | Overall survival    |                   | Progression free survival |                   |
|---------------------|-----------|----------|---------------------|-------------------|---------------------------|-------------------|
|                     |           |          | H.R. (95% CI)       | p                 | H.R. (95% CI)             | p                 |
| Age                 | < median  | 29 (49%) | 1                   | 0.204             | 1                         | 0.133             |
|                     | >= median | 30 (51%) | 1.48 (0.81 - 2.73)  |                   | 1.53 (0.88 - 2.65)        |                   |
| Menopause           | no        | 16 (27%) | 1                   | 0.93              | 1                         | 0.937             |
|                     | yes       | 43 (73%) | 0.97 (0.5 - 1.87)   |                   | 0.98 (0.53 - 1.79)        |                   |
| FIGO Stage          | I-II      | 7 (12%)  | 1                   | <b>0.0203</b>     | 1                         | <b>0.009</b>      |
|                     | III-IV    | 52 (88%) | 10.56 (1.44 - 77.3) |                   | 6.63 (1.6 - 27.45)        |                   |
| Residual Tumor      | no        | 18 (31%) | 1                   | <b>&lt; 0.001</b> | 1                         | <b>0.002</b>      |
|                     | yes       | 41 (69%) | 7.15 (2.75 - 18.64) |                   | 2.89 (1.47 - 5.68)        |                   |
| Peritoneal cytology | negative  | 12 (20%) | 1                   | <b>0.007</b>      | 1                         | <b>0.002</b>      |
|                     | positive  | 47 (80%) | 4.25 (1.5 - 12.08)  |                   | 4.41 (1.72 - 11.32)       |                   |
| CD3                 | Low       | 29 (49%) | 1                   | <b>0.001</b>      | 1                         | 0.056             |
|                     | High      | 30 (51%) | 0.35 (0.19 - 0.66)  |                   | 0.58 (0.34 - 1.01)        |                   |
| CD163               | Low       | 29 (49%) | 1                   | <b>0.019</b>      | 1                         | <b>0.042</b>      |
|                     | High      | 30 (51%) | 0.48 (0.26 - 0.89)  |                   | 0.56 (0.32 - 0.98)        |                   |
| Immunoscore         | LoLo      | 22 (37%) | 1                   |                   | 1                         |                   |
|                     | LoHi/HiLo | 14 (24%) | 0.17 (0.07 - 0.43)  | <b>&lt; 0.001</b> | 0.23 (0.1 - 0.51)         | <b>&lt; 0.001</b> |
|                     | HiHi      | 23 (39%) | 0.28 (0.14 - 0.56)  | <b>&lt; 0.001</b> | 0.41 (0.22 - 0.76)        | <b>0.005</b>      |

**Supplementary Table S6:** OC-IS<sup>30</sup> Gene signature, R and adjusted p-values (Hommel) of Pearson correlation analysis between log<sub>2</sub>gene expression and log<sub>2</sub>Immune cell densities.  $\beta$  coefficients obtained by ridge linear regression of Z-score gene expression having as dependent variable the sum of CD3<sup>+</sup> and CD163<sup>+</sup> cell densities.

| Gene     | CD3  |         | CD163 |         | CD3 + CD163 |
|----------|------|---------|-------|---------|-------------|
|          | R    | p       | R     | p       | $\beta$     |
| CXCL10   | 0.73 | 2.3E-12 | 0.58  | 2.9E-06 | 0.0574      |
| IRF1     | 0.71 | 2.4E-11 | 0.58  | 3.1E-06 | 0.0573      |
| CSF1     | 0.48 | 0.0009  | 0.51  | 0.0002  | 0.0573      |
| CXCL9    | 0.76 | 4.6E-14 | 0.54  | 3.6E-05 | 0.0506      |
| IL15     | 0.50 | 0.0003  | 0.43  | 0.0087  | 0.0385      |
| PDCD1LG2 | 0.71 | 3.4E-11 | 0.54  | 4.8E-05 | 0.0357      |
| STAT1    | 0.54 | 4.1E-05 | 0.50  | 0.0004  | 0.0333      |
| GZMA     | 0.75 | 1.1E-13 | 0.52  | 0.0001  | 0.0320      |
| CD274    | 0.76 | 4.2E-14 | 0.53  | 5.4E-05 | 0.0310      |
| CCL4     | 0.41 | 0.0215  | 0.38  | 0.0701  | 0.0284      |
| CCL2     | 0.39 | 0.0431  | 0.28  | 0.9895  | 0.0282      |
| OAS1     | 0.44 | 0.0079  | 0.43  | 0.0105  | 0.0267      |
| CD8A     | 0.61 | 2.7E-07 | 0.46  | 0.0027  | 0.0254      |
| MX1      | 0.39 | 0.0497  | 0.47  | 0.0017  | 0.0243      |
| CXCL16   | 0.39 | 0.0414  | 0.44  | 0.0059  | 0.0209      |
| CXCL13   | 0.58 | 2.0E-06 | 0.46  | 0.0027  | 0.0206      |
| GNLY     | 0.64 | 3.7E-08 | 0.49  | 0.0007  | 0.0197      |
| CCL8     | 0.44 | 0.0065  | 0.36  | 0.1310  | 0.0191      |
| IDO1     | 0.58 | 2.7E-06 | 0.43  | 0.0114  | 0.0167      |
| CSF1R    | 0.45 | 0.0040  | 0.42  | 0.0169  | 0.0167      |
| GZMH     | 0.57 | 5.7E-06 | 0.38  | 0.0618  | 0.0143      |
| CD86     | 0.41 | 0.0205  | 0.32  | 0.4621  | 0.0139      |
| CCL5     | 0.75 | 2.1E-13 | 0.60  | 7.7E-07 | 0.0116      |
| CD163    | 0.41 | 0.0193  | 0.41  | 0.0232  | 0.0102      |
| GZMB     | 0.60 | 9.2E-07 | 0.40  | 0.0344  | 0.0095      |
| PRF1     | 0.61 | 2.8E-07 | 0.45  | 0.0051  | 0.0093      |
| CTLA4    | 0.57 | 7.4E-06 | 0.35  | 0.1727  | 0.0092      |
| CXCL11   | 0.65 | 8.9E-09 | 0.44  | 0.0069  | 0.0086      |
| CCL19    | 0.50 | 0.0004  | 0.30  | 0.7086  | 0.0013      |
| PDCD1    | 0.41 | 0.0187  | 0.31  | 0.6830  | 0.0006      |

**Supplementary Table S7:** Results of the gene pathway analysis investigating the cluster 9, identified by scRNAseq analysis, through the Reactome datasets (attached .csv file).
